# Supplementary material for: Manifold-adaptive dimension estimation revisited
Source: PeerJ journal article supplement (doi:10.7717/peerj-cs.790), 2022-01-06

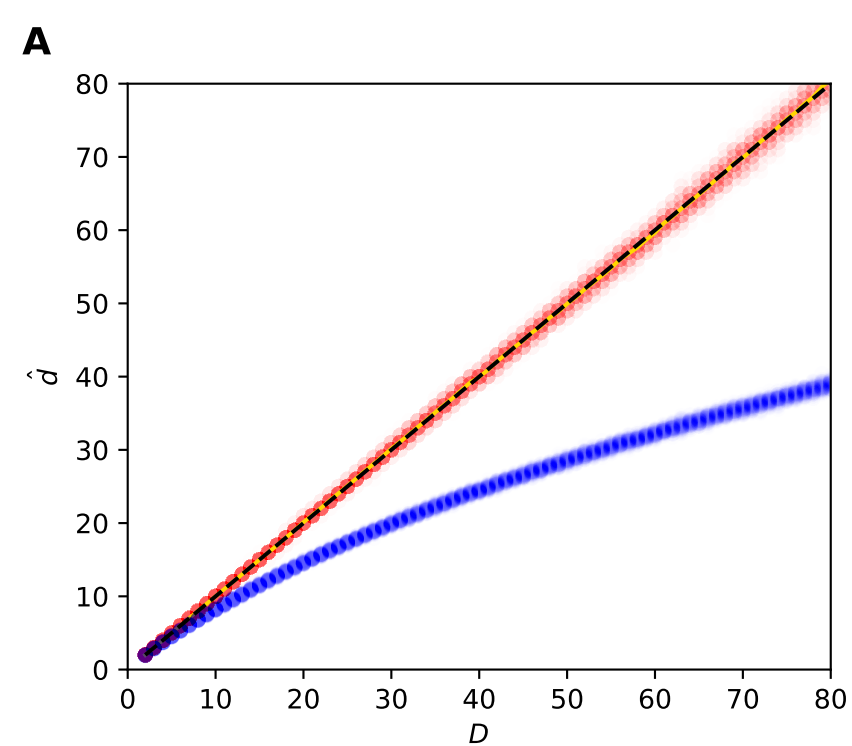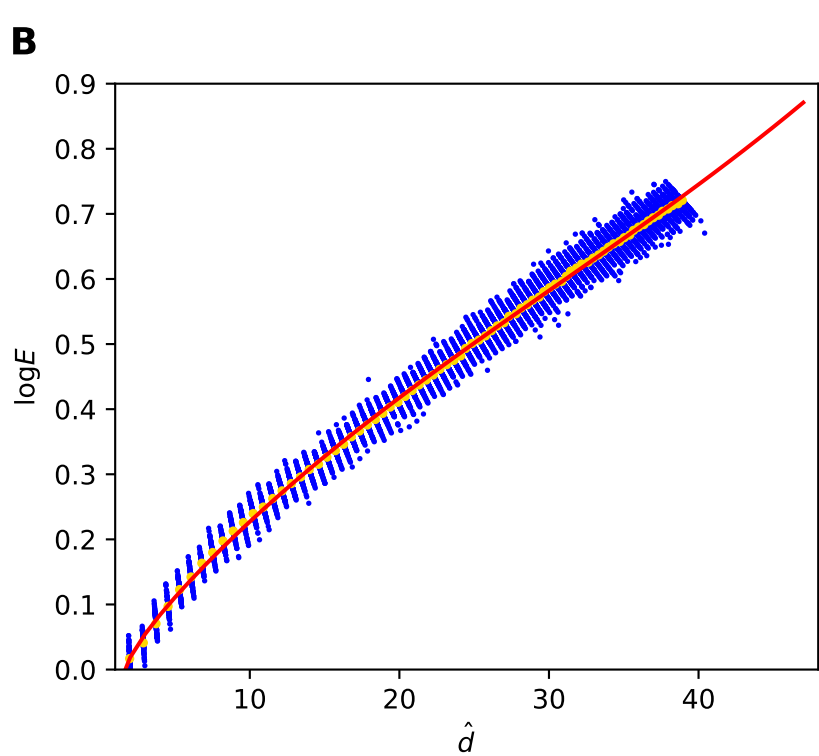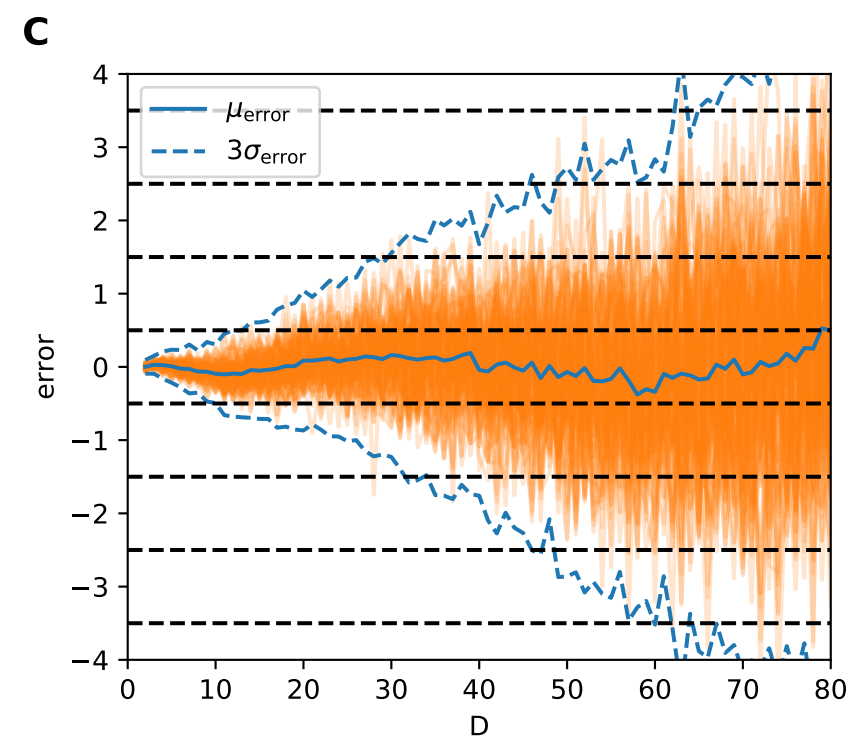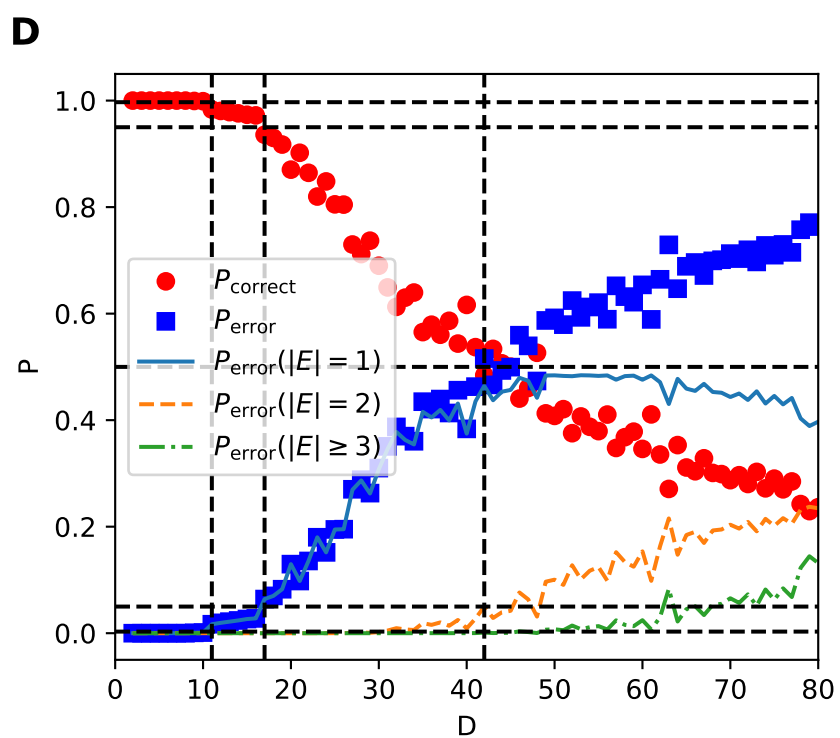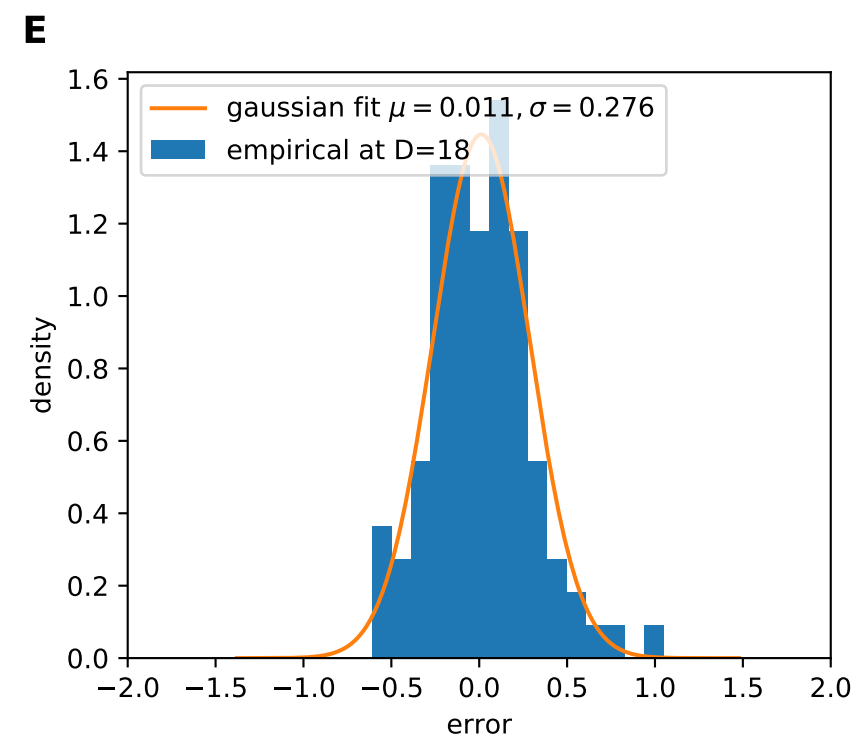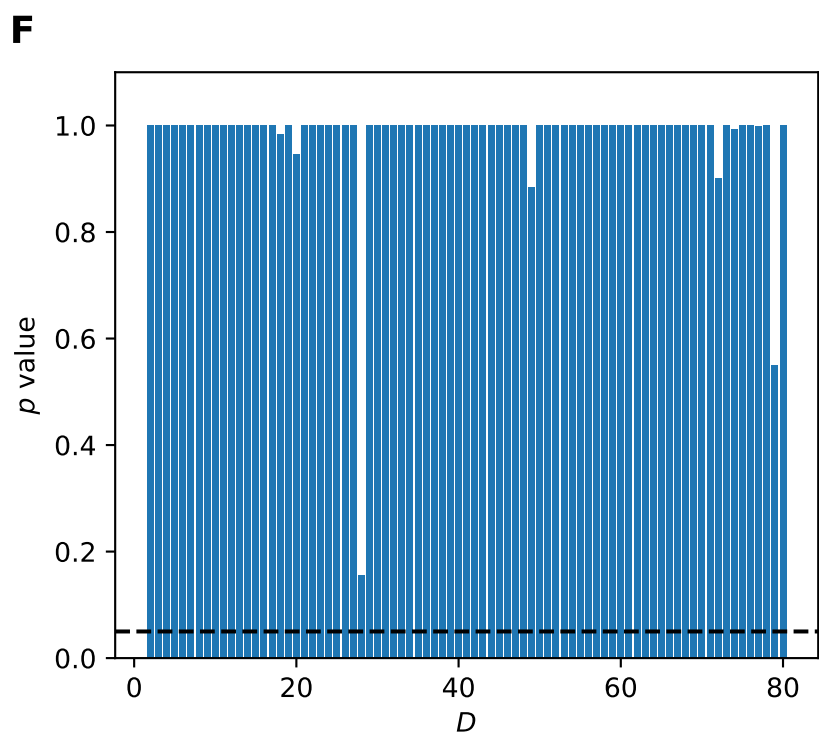

Supplement: FigureS1.pdf [file FigureS1.pdf]
