# Supplementary material for: Manifold-adaptive dimension estimation revisited
Source: PeerJ journal article supplement (doi:10.7717/peerj-cs.790), 2022-01-06
Supplement: SI.pdf [file SI.pdf]

1 Supplemental Information:  
2 Manifold-adaptive dimension estimation revisited

3 Zsigmond Benkő<sup>1,2, \*</sup>, Marcell Stippinger<sup>1</sup>, Roberta Rehus<sup>1</sup>, Attila  
4 Bencze<sup>1</sup>, Dániel Fabó<sup>4</sup>, Boglárka Hajnal<sup>2, 4</sup>, Loránd Eröss<sup>5,6</sup>,  
5 András Telcs<sup>1,3,7</sup>, and Zoltán Somogyvári<sup>1,8</sup>

6 <sup>1</sup>Department of Computational Sciences, Wigner Research Centre for Physics, H-1121,  
7 Hungary

8 <sup>2</sup>János Szentágothai Doctoral School of Neurosciences, Semmelweis University, H-1085,  
9 Hungary

10 <sup>3</sup>Department of Computer Science and Information Theory, Faculty of Electrical  
11 Engineering and Informatics, Budapest University of Technology and Economics, Budapest,  
12 H-1111, Hungary

13 <sup>4</sup>Epilepsy Center, Department of Neurology, National Institute of Clinical Neurosciences,  
14 Budapest, H-1145, Hungary

15 <sup>5</sup>Department of Functional Neurosurgery, National Institute of Clinical Neurosciences,  
16 Budapest, H-1145, Hungary

17 <sup>6</sup>Faculty of Information Technology and Bionics, Péter Pázmány Catholic University,  
18 Budapest, H-1083, Hungary

19 <sup>7</sup>Department of Quantitative Methods, University of Pannonia, Faculty of Business and  
20 Economics, H-8200, Veszprém, Hungary

21 <sup>8</sup>Neuromicrosystems ltd., Budapest, H-1113, Hungary

22 **A Calculations for normalized distances**

23 **A.1 Distance density of the nearest neighbors**

24 Let's take  $K - 1$  points in the unit  $D$ -sphere randomly, and dimensionality  
25 for the calibration hypercubes. The diagonal (dashed) is thewe chose one with  
26  $r$  distance from the center. This situation simulates a  $K$ -neighborhood, with  
27 normalized distances of  $K - 1$  points from the center. The next formula tells us  
28 the probability that a selected point at  $r$  was the  $k$ th from the center.

$$P(k|r, K, D) = \binom{K-2}{k-1} r^{D(k-1)} (1-r^D)^{K-k-1} \quad (\text{S.1})$$

29 here  $r$  can take values from the  $[0, 1]$  interval.

30 Moreover the probability density that there is a point at  $r$  radius is given by  
 31 the following derivation formula:

$$p(r|D) = Dr^{D-1} \quad (\text{S.2})$$

32 If sampling process is independent, the pdf that a point is on the radius  $r$  from  
 33  $K - 1$  points is the same and independent of sample size:

$$\begin{aligned} p(r|K-1, D) &= \sum_{j=1}^n \frac{1}{n} \underbrace{\int dr_1 \cdots \int dr_i \cdots \int dr_n}_{i \neq j} p(r_1, r_2, \dots, r_j = r, \dots, r_n | D) \\ &= \sum_{j=1}^n \frac{1}{n} \underbrace{\int \int \cdots \int}_{n-1} \prod_{i=1}^n Dr_i^{D-1} \underbrace{dr_i}_{i \neq j} = \frac{1}{n} \sum_{j=1}^n Dr_j^{D-1} = Dr^{D-1} \end{aligned} \quad (\text{S.3})$$

34 This is the prior pdf of distance, we assume uniform density in the n-sphere.  
 35 This prior can be any density, we chose this specific form with respect to the  
 36 maximum entropy principle and also for practical reasons.

37 From the previous two formulas, we can write up the joint mixed probability  
 38 function:

$$p(k, r|K-1, D) = D \binom{K-2}{k-1} r^{Dk-1} (1-r^D)^{n-k} \quad (\text{S.4})$$

39 Also:

$$p(k|K-1, D) = \frac{1}{K-1} \quad (\text{S.5})$$

40 Using Bayes theorem, we derive the distance distribution of the  $k$ th neighbor:

$$p(r|k, K-1, D) = \frac{P(k|r, K-1, D)p(r|K-1, D)}{p(k|K-1, D)} \quad (\text{S.6})$$

$$= (K-1)D \binom{K-2}{k-1} r^{Dk-1} (1-r^D)^{K-k-1} \quad (\text{S.7})$$

$$= \frac{D}{B(k, K-k)} r^{Dk-1} (1-r^D)^{K-k-1} \quad (\text{S.8})$$

41 Where  $B$  is the beta function.

42 **A.2 Maximum Likelihood estimation of intrinsic dimen-**  
 43 **sion**

44 Given a dataset, we can use the Maximum Likelihood principle to estimate  
 45 intrinsic dimensionality by using Eq. S.8. The dataset is  $K-1$  randomly sampled  
 46 points inside a  $d$ -dimensional sphere. But first we have to express the likelihood  
 47 function:

$$\mathcal{L}(D|X) = p(r_1, \dots, r_{K-1}|D) \quad (\text{S.9})$$

48 This expression can be factorized into a chain because  $p(r_k|r_{k+1}, r_{k+2}, \dots, r_{K-1}) =$   
 49  $p(r_k|r_{k+1})$  which is a Markov property of neighbor distances.

$$\mathcal{L}(D|X) = p(r_1, \dots, r_{K-1}|D) = \prod_1^{K-1} p(r_k|r_{k+1}, D) \quad (\text{S.10})$$

50 where  $r_K = 1$ .

$$p(r_k|r_{k+1}, D) = kD \left( \frac{r_k}{r_{k+1}} \right)^{kD-1} \frac{1}{r_{k+1}} \quad (\text{S.11})$$

51 So if we substitute back into the previous expression:

$$\begin{aligned} \mathcal{L}(D|X) &= p(r_1, \dots, r_n|D) = \prod_1^{K-1} p(r_k|r_{k+1}, d) \\ &= (K-1)! D^{K-1} \frac{r_1^{D-1}}{r_2^D} \frac{r_2^{2D-1}}{r_3^{2D}} \frac{r_3^{3D-1}}{r_4^{3D}} \dots \frac{r_{K-1}^{(K-1)D-1}}{r_K^{(K-1)D}} \\ &= (K-1)! D^{K-1} \left( \prod_1^{K-1} r_k \right)^{D-1} \end{aligned} \quad (\text{S.12})$$

52 The log likelihood:

$$\log \mathcal{L}(D|X) = \left( \sum_1^{K-1} \log k \right) + (K-1) \log D + (D-1) \sum_1^{K-1} \log r_k \quad (\text{S.13})$$

53 We seek for extrema of the likelihood function:

$$\begin{aligned} \frac{\partial \log \mathcal{L}(D|X)}{\partial D} &\stackrel{!}{=} 0 \\ \frac{K-1}{D} + \sum_1^{K-1} \log r_k &\stackrel{!}{=} 0 \end{aligned} \quad (\text{S.14})$$

$$d_{\text{ML}} = \frac{K-1}{-\sum_1^{K-1} \log r_k} \quad (\text{S.15})$$

54 This latter formula is basically equivalent to the local Levina-Bickel ML  
 55 intrinsic dimension estimator if  $r_k = \frac{R_k}{R_K}$ .

## 56 B Derivation of the pdf of the FSA estimator

57 The starting point of our derivation is the posterior density of  $r$ , computed in  
 58 Section 1:

$$p(r|k, K-1, D) = \frac{D}{B(k, K-k)} r^{Dk-1} (1-r^D)^{K-k-1} \quad (\text{S.16})$$

59 We fill in  $K = 2k$  to the previous expression:

$$p(r|k, 2k-1, D) = \frac{D}{B(k, k)} r^{Dk-1} (1-r^D)^{k-1} \quad (\text{S.17})$$

60 The pdf of local dimension estimates  $\delta$  can be expressed from the pdf of  
 61 distances  $r$  with a simple intergal transform (change of variables):

$$p(r|k, 2k-1, D) dr = q(\delta) d\delta \quad (\text{S.18})$$

62 SO

$$q(\delta) = p(r|k, 2k-1, D) \left| \frac{dr}{d\delta} \right| \quad (\text{S.19})$$

63 To compute the above expression, we first express  $r$  as a function of  $\delta$ , then  
 64 we compute the derivative. Afterwards we put the things together.

$$\delta = -\frac{\log 2}{\log r} \implies r = \exp\left(-\frac{\log 2}{\delta}\right) \implies \frac{dr}{d\delta} = \exp\left(-\frac{\log 2}{\delta}\right) \frac{\log 2}{\delta^2} \quad (\text{S.20})$$

65 And finally, we put together these parts to get the pdf of the FSA estimator:

$$\begin{aligned} q(\delta|k, D) &= \frac{D}{B(k, k)} e^{(-\frac{\log 2}{\delta}(Dk-1))} \left(1 - e^{(-\frac{\log 2}{\delta}D)}\right)^{k-1} e^{(-\frac{\log 2}{\delta})} \frac{\log 2}{\delta^2} = \\ &= \frac{D \log(2) 2^{-\frac{Dk}{\delta}} \left(1 - 2^{-\frac{D}{\delta}}\right)^{k-1}}{B(k, k) \delta^2} \end{aligned} \quad (\text{S.21})$$

66 where  $B(k, k) = \frac{\Gamma(k)\Gamma(k)}{\Gamma(2k)}$  is the Euler beta function.

67 **C Intuitive derivation for the asymptotic prob-**  
68 **ability density of the median**

69 For an odd sample size one can compute the asymptotic distribution of the  
70 sample median in an intuitive manner, if the distributions are given.

71 Let  $X$  be a continuous random variable and  $q$  and  $Q$  are it's probability  
72 density function and probability distribution respectively. Also, let  $\{x_i\}_{i=1}^n$  be  
73 a sample of  $n = 2l + 1$  odd sample-points drawn independently from the  $q$   
74 density. We would like to derive the probability that the median falls into an  
75 infinitesimally small interval  $dx$  around  $X = x$  value. The probability that  
76 the value of a sample point is smaller than  $x$  is given by  $Q(x)$ . Similarly the  
77 probability that the value is bigger than  $x$  is  $1 - Q(x)$ . Also, the probability that  
78 a point exactly falls into a small range around  $x$  is given by  $q(x)dx$  by definition.  
79 For the whole sample  $l = \frac{n-1}{2}$  points has to bigger and smaller than  $x$  and one  
80 sample has to be around it, so the probability is given by the following trinomial  
81 formula for an independent identically distributed sample:

$$P(x) = \frac{n!}{l!l!} Q(x)^l [1 - Q(x)]^l q(x) dx \quad (\text{S.22})$$

82 where  $P(x)$  is the probability that the median is at  $X = x$  value.  $Q(x)^l$  is the  
83 probability that  $l$  points has lower value than  $x$  and similarly  $[1 - Q(x)]^l$  is the  
84 probability of  $l$  points has bigger value than  $x$ . The  $\frac{n!}{l!l!} = \frac{1}{B(l+1, l+1)}$  multiplier  
85 is a combinatorial normalizing constant, which can be written alternatively as  
86 an Euler-beta function with  $l + 1$  as both of it's argument.

87 **D Standard error of the median with Stirling**  
88 **approximation**

According to Laplace, the probability distribution of the median is approxi-  
mately Gaussian, with mean as the median (asymptotically) and with the vari-  
ance:

$$\sigma^2 = \frac{1}{4nq(D)^2} \quad (\text{S.23})$$

89 where  $n$  is the samples size and  $q$  is the pdf from which the sample was inde-  
90 pendently generated and  $D$  is the median.

We substitute eq.S.21 into eq.S.23 and by taking the squareroot, we get:

$$\sigma = \frac{2^{2k-2} B(k, k) D}{\log(2) \sqrt{n}} \quad (\text{S.24})$$

Using the Stirling approximation for the beta function ( $k \rightarrow \infty$ ) we can  
simplify the above expression in the function of neighborhood size.

$$B(k, k) \approx \frac{\sqrt{2\pi} k^{k-0.5} k^{k-0.5}}{(2k)^{2k-0.5}} = \frac{\sqrt{\pi} 2^{1-2k}}{\sqrt{k}} \quad (\text{S.25})$$

If we substitute back eq.S.25 into eq.S.24 we get the following approximate expression for the standard error of median:

$$\sigma \approx \frac{\sqrt{\pi}}{2 \log 2} \frac{D}{\sqrt{nk}} \quad (\text{S.26})$$

91 This formula expresses that the standard error of the median is proportional to  
 92 the intrinsic dimension and shrinks with the squareroot of the sample size ( $n$ )  
 93 and neighborhood size( $k$ ).

## 94 E Supplemental Figures and tables

STable 1: **Used symbols with interpretation.**

|            |   |                                                                                    |
|------------|---|------------------------------------------------------------------------------------|
| $k$        | - | the order of the neighbor (increasing order as the distance from the center rises) |
| $K - 1$    | - | number of points in the neighborhood                                               |
| $R$        | - | distance from center                                                               |
| $r$        | - | normalized distance from center $r = R/R_K$ ( $r \in [0, 1]$ )                     |
| $\eta$     | - | local density-dependent factor, approximately independent of $R$                   |
| $D$        | - | intrinsic dimensionality of the space where the points are.                        |
| $\delta$   | - | local intrinsic dimension estimate                                                 |
| $d$        | - | global intrinsic dimension estimate                                                |
| $P$        | - | Probability, probability mass function                                             |
| $p$ or $q$ | - | probability density function (pdf)                                                 |
| $q$        | - | probability density function of the mFSA estimate estimate                         |
| $Q$        | - | probability distribution of the mFSA estimate estimate                             |
| $n$        | - | sample size                                                                        |
| $N$        | - | number of realizations                                                             |
| $B$        | - | Euler beta function                                                                |

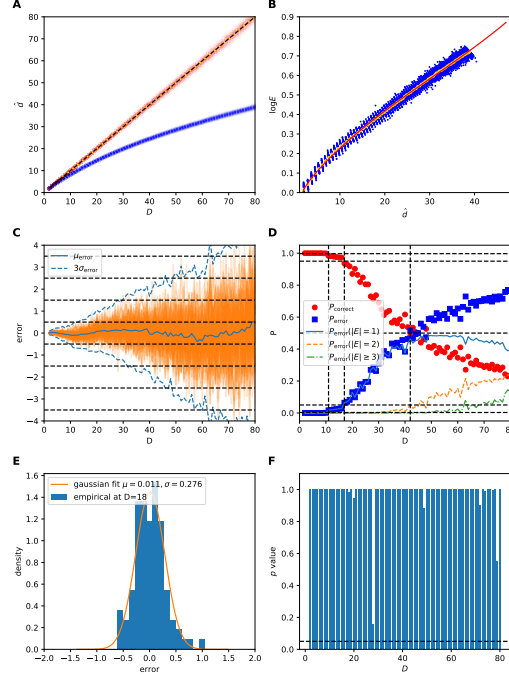

SFig. 1: **Calibration procedure for the  $n = 2500$  datasets up to  $D = 80$  ( $k = 5$ ).** The figure shows the calibration procedure on 100 instances of uniformly sampled hypercubes. **A** Dimension estimates in the function of intrinsic dimensionality for the calibration hypercubes. The diagonal (dashed) is the ideal value, however the mFSA estimates (blue) show saturation because of finite sample and edge effects. cmFSA estimates (red) are also shown, with the mean (yellow) almost aligned with the diagonal. **B** The relative error ( $E$ ) in the function of uncorrected mFSA dimension on semilogarithmic scale. The error-mFSA pairs (blue) lie on a short stripe for each intrinsic dimension value. The subplot also shows id-wise average points (yellow) and the polynomial fitting curve (red). **C** The error of cmFSA estimates in the function of intrinsic dimension on the calibration datasets. The mean error (blue line) oscillates around zero and the 99.7% confidence interval (blue dashed) widens as ID grows. The rounding switch-points are also shown. **D** The probability that cmFSA hits the real ID of data, or misses by one, two or more as a function of ID on the calibration dataset. **E** The error is approximately gaussian as shown through the empirical distribution at  $D = 18$  with the fitted gaussian. **F** Results of normality test show, that the error do not deviate significantly ( $\alpha = 0.05$  dashed line) from a gaussian error distribution. We applied Bonferroni correction for multiple comparisons, the blue bars are the  $p$ -values.

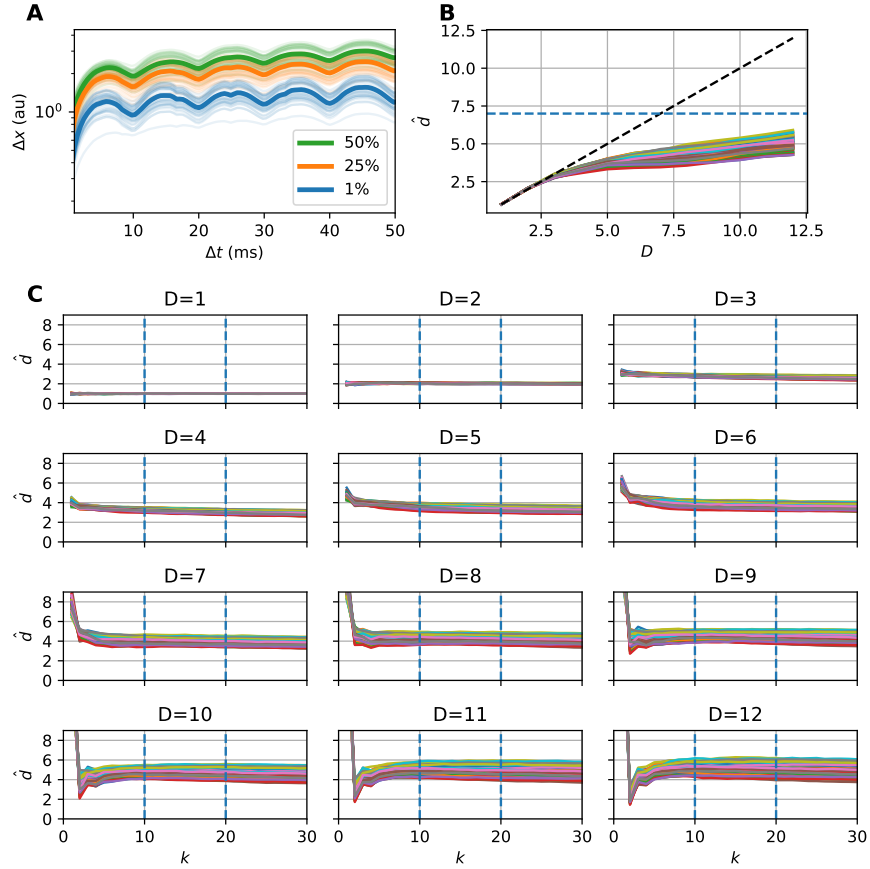

**S**Fig. 2: **S**ubsampling and embedding of the CSD signals. **A** Mean Space-time separation plot of the CSD recordings, the lines show the contours of the 1% (blue), 25% (orange), and 50% (green) percentiles for the 34 - 16 interictal and 18 seizures - recordings (thin lines) and their average (thick line,  $D = 2$ ). The first local maximum is at around 5 ms (10 time steps), which appoints the proper subsampling to avoid the effect of temporal correlations during the dimension estimation. **B** Intrinsic dimension in the function of the embedding dimension for the 88 recording-channels (averaged between  $k = 5 - 10$ , for the first seizure). Dimension-estimates deviate from the diagonal above  $D = 3$ , thus we chose  $D = 2 \cdot 3 + 1 = 7$  as embedding dimension. **C** Intrinsic dimension in the function of neighborhood size for various embedding dimensions (88 channels, for the first seizure). The dimension estimates are settled at the neighborhood size between  $k=10 - 20$  (dashed blue). The knee because of the autocorrelation becomes pronounced for  $D \geq 8$ .
